# Supplementary material
Source: ML conference proceedings conference paper supplement (https://proceedings.neurips.cc/paper_files/paper/2022/hash/5b5de8526aac159e37ff9547713677ed-Abstract.html)
Supplement: Supplementary file 1 [file 5b5de8526aac159e37ff9547713677ed-Supplemental-Conference.zip]

Archive with 174 entries (155 files):
- supplementary/
- supplementary/bio-pcn/
- supplementary/bio-pcn/draft/
- supplementary/bio-pcn/draft/make_linear_figures_extra.py
- supplementary/bio-pcn/draft/make_linear_rho_dep_figures.py
- supplementary/bio-pcn/draft/make_weight_symmetry_figures.py
- supplementary/bio-pcn/draft/hyper_rho/
- supplementary/bio-pcn/draft/hyper_rho/submit_task.sh
- supplementary/bio-pcn/draft/hyper_rho/.gitignore
- supplementary/bio-pcn/draft/hyper_rho/run_once.sh
- supplementary/bio-pcn/draft/hyper_rho/data/
- supplementary/bio-pcn/draft/hyper_rho/data/.gitignore
- supplementary/bio-pcn/draft/hyper_rho/task_file.db
- supplementary/bio-pcn/draft/hyper_rho/optimize_net.py
- supplementary/bio-pcn/draft/visualize_hyper.py
- supplementary/bio-pcn/draft/figs/
- supplementary/bio-pcn/draft/figs/.gitignore
- supplementary/bio-pcn/draft/make_linear_rho_dep_figures_mmill.py
- supplementary/bio-pcn/draft/make_misc_figures.py
- supplementary/bio-pcn/draft/make_generalization_plots.py
- supplementary/bio-pcn/draft/make_linear_figures_mmill.py
- supplementary/bio-pcn/draft/make_linear_rho_dep_figures_mmill_large.py
- supplementary/bio-pcn/draft/simulations/
- supplementary/bio-pcn/draft/simulations/task_file_small.db
- supplementary/bio-pcn/draft/simulations/run_once_extra.sh
- supplementary/bio-pcn/draft/simulations/task_file_large.db
- supplementary/bio-pcn/draft/simulations/submit_task_other.sh
- supplementary/bio-pcn/draft/simulations/run_once_lfw.sh
- supplementary/bio-pcn/draft/simulations/submit_task_lfw.sh
- supplementary/bio-pcn/draft/simulations/run_simulation.py
- supplementary/bio-pcn/draft/simulations/task_file_lfw.db
- supplementary/bio-pcn/draft/simulations/task_file_cifar10.db
- supplementary/bio-pcn/draft/simulations/run_once_other.sh
- supplementary/bio-pcn/draft/simulations/.gitignore
- supplementary/bio-pcn/draft/simulations/run_once_large.sh
- supplementary/bio-pcn/draft/simulations/submit_task_fashionmnist.sh
- supplementary/bio-pcn/draft/simulations/submit_task_cifar10.sh
- supplementary/bio-pcn/draft/simulations/run_once_small.sh
- supplementary/bio-pcn/draft/simulations/task_file_other.db
- supplementary/bio-pcn/draft/simulations/task_file_cifar100.db
- supplementary/bio-pcn/draft/simulations/data/
- supplementary/bio-pcn/draft/simulations/data/.gitignore
- supplementary/bio-pcn/draft/simulations/task_file_fashionmnist.db
- supplementary/bio-pcn/draft/simulations/submit_task_large.sh
- supplementary/bio-pcn/draft/simulations/submit_task_cifar100.sh
- supplementary/bio-pcn/draft/simulations/submit_task_small.sh
- supplementary/bio-pcn/draft/nb/
- supplementary/bio-pcn/draft/nb/linear_1hidden_20220428a.ipynb
- supplementary/bio-pcn/draft/nb/visualize_hyper_20220510.ipynb
- supplementary/bio-pcn/draft/make_linear_figures.py
- supplementary/bio-pcn/draft/save/
- supplementary/bio-pcn/draft/save/.gitignore
- supplementary/bio-pcn/draft/data/
- supplementary/bio-pcn/draft/data/.gitignore
- supplementary/bio-pcn/draft/hyper/
- supplementary/bio-pcn/draft/hyper/task_file_small.db
- supplementary/bio-pcn/draft/hyper/run_once_cifar100.sh
- supplementary/bio-pcn/draft/hyper/task_file_large.db
- supplementary/bio-pcn/draft/hyper/submit_task_other.sh
- supplementary/bio-pcn/draft/hyper/run_once_lfw.sh
- supplementary/bio-pcn/draft/hyper/submit_task_lfw.sh
- supplementary/bio-pcn/draft/hyper/task_file_lfw.db
- supplementary/bio-pcn/draft/hyper/run_once_cifar10.sh
- supplementary/bio-pcn/draft/hyper/task_file_cifar10.db
- supplementary/bio-pcn/draft/hyper/run_once_other.sh
- supplementary/bio-pcn/draft/hyper/run_once_fashionmnist.sh
- supplementary/bio-pcn/draft/hyper/.gitignore
- supplementary/bio-pcn/draft/hyper/run_once_large.sh
- supplementary/bio-pcn/draft/hyper/submit_task_fashionmnist.sh
- supplementary/bio-pcn/draft/hyper/submit_task_cifar10.sh
- supplementary/bio-pcn/draft/hyper/run_once_small.sh
- supplementary/bio-pcn/draft/hyper/task_file_other.db
- supplementary/bio-pcn/draft/hyper/task_file_cifar100.db
- supplementary/bio-pcn/draft/hyper/data/
- supplementary/bio-pcn/draft/hyper/data/.gitignore
- supplementary/bio-pcn/draft/hyper/task_file_fashionmnist.db
- supplementary/bio-pcn/draft/hyper/submit_task_large.sh
- supplementary/bio-pcn/draft/hyper/submit_task_cifar100.sh
- supplementary/bio-pcn/draft/hyper/submit_task_small.sh
- supplementary/bio-pcn/draft/hyper/optimize_net.py
- supplementary/bio-pcn/LICENSE
- supplementary/bio-pcn/requirements.txt
- supplementary/bio-pcn/test/
- supplementary/bio-pcn/test/test_train.py
- supplementary/bio-pcn/test/test_wrapper.py
- supplementary/bio-pcn/test/test_tqdm_wrapper.py
- supplementary/bio-pcn/test/test_util.py
- supplementary/bio-pcn/test/test_non_linear.py
- supplementary/bio-pcn/test/test_pcn.py
- supplementary/bio-pcn/test/test_track.py
- supplementary/bio-pcn/test/test_linear.py
- supplementary/bio-pcn/conda.yml
- supplementary/bio-pcn/README.md
- supplementary/bio-pcn/setup.py
- supplementary/bio-pcn/.gitignore
- supplementary/bio-pcn/sandbox/
- supplementary/bio-pcn/sandbox/scratch_mnist_large_single.py
- supplementary/bio-pcn/sandbox/scratch_mnist_2hidden.py
- supplementary/bio-pcn/sandbox/scratch_simple_hyperopt_pcn.py
- supplementary/bio-pcn/sandbox/scratch_naive_fashion_mnist.py
- supplementary/bio-pcn/sandbox/scratch_simple_hyperopt.py
- supplementary/bio-pcn/sandbox/scratch_naive_multiview_lfw.py
- supplementary/bio-pcn/sandbox/scratch_naive_cifar100.py
- supplementary/bio-pcn/sandbox/scratch_mnist_large.py
- supplementary/bio-pcn/sandbox/scratch_naive_mediamill.py
- supplementary/bio-pcn/sandbox/pcn_constrained_diagnostics.py
- supplementary/bio-pcn/sandbox/cpcn_diagnostics.py
- supplementary/bio-pcn/sandbox/scratch_naive_mnist.py
- supplementary/bio-pcn/sandbox/profile_pcn.py
- supplementary/bio-pcn/sandbox/scratch_naive_mediamill_large.py
- supplementary/bio-pcn/sandbox/check_weight_symmetry.py
- supplementary/bio-pcn/sandbox/nb/
- supplementary/bio-pcn/sandbox/nb/scratch_mnist_large_single_20220619a.ipynb
- supplementary/bio-pcn/sandbox/nb/cpcn_diagnostics_20220504a.ipynb
- supplementary/bio-pcn/sandbox/nb/scratch_mnist_2hidden_20220504b.ipynb
- supplementary/bio-pcn/sandbox/nb/scratch_naive_mnist_20220504a.ipynb
- supplementary/bio-pcn/sandbox/nb/pcn_constrained_diagnostics_20220503a.ipynb
- supplementary/bio-pcn/sandbox/nb/scratch_naive_mnist_20220422a.ipynb
- supplementary/bio-pcn/sandbox/nb/scratch_naive_mnist_20220418a.ipynb
- supplementary/bio-pcn/sandbox/nb/scratch_naive_mnist_20220506a.ipynb
- supplementary/bio-pcn/sandbox/nb/cpcn_diagnostics_20220422a.ipynb
- supplementary/bio-pcn/sandbox/nb/scratch_naive_fashion_mnist_20220727a.ipynb
- supplementary/bio-pcn/sandbox/nb/scratch_rank_hidden_20220505a.ipynb
- supplementary/bio-pcn/sandbox/nb/scratch_mnist_large_20220617a.ipynb
- supplementary/bio-pcn/sandbox/nb/scratch_simple_hyperopt_20220419a.ipynb
- supplementary/bio-pcn/sandbox/nb/scratch_naive_mnist_20220617a.ipynb
- supplementary/bio-pcn/sandbox/nb/scratch_mnist_large_20220506a.ipynb
- supplementary/bio-pcn/sandbox/nb/initial_state_diagnostics_20220504a.ipynb
- supplementary/bio-pcn/sandbox/nb/scratch_mnist_2hidden_20220617b.ipynb
- supplementary/bio-pcn/sandbox/nb/scratch_mnist_large_single_20220617a.ipynb
- supplementary/bio-pcn/sandbox/nb/pcn_constrained_diagnostics_20220505a.ipynb
- supplementary/bio-pcn/sandbox/nb/scratch_simple_hyperopt_pcn_20220506a.ipynb
- supplementary/bio-pcn/sandbox/nb/scratch_simple_hyperopt_pcn_20220422a.ipynb
- supplementary/bio-pcn/sandbox/nb/scratch_mnist_2hidden_20220504a.ipynb
- supplementary/bio-pcn/sandbox/nb/scratch_naive_mnist_20220504b.ipynb
- supplementary/bio-pcn/sandbox/nb/scratch_naive_mnist_20220418b.ipynb
- supplementary/bio-pcn/sandbox/nb/scratch_naive_mnist_20220422b.ipynb
- supplementary/bio-pcn/sandbox/nb/scratch_mnist_2hidden_20220617a.ipynb
- supplementary/bio-pcn/sandbox/nb/cpcn_diagnostics_20220421a.ipynb
- supplementary/bio-pcn/sandbox/nb/scratch_naive_mediamill_20220619a.ipynb
- supplementary/bio-pcn/sandbox/nb/scratch_naive_mnist_20220505a.ipynb
- supplementary/bio-pcn/sandbox/nb/cpcn_diagnostics_20220505a.ipynb
- supplementary/bio-pcn/sandbox/nb/scratch_naive_mnist_20220421a.ipynb
- supplementary/bio-pcn/sandbox/nb/cpcn_diagnostics_20220427b.ipynb
- supplementary/bio-pcn/sandbox/nb/scratch_mnist_large_20220517a.ipynb
- supplementary/bio-pcn/sandbox/nb/scratch_naive_mediamill_large_20220617a.ipynb
- supplementary/bio-pcn/sandbox/nb/scratch_naive_mnist_20220419a.ipynb
- supplementary/bio-pcn/sandbox/nb/scratch_naive_mediamill_20220617a.ipynb
- supplementary/bio-pcn/sandbox/nb/scratch_simple_hyperopt_20220506a.ipynb
- supplementary/bio-pcn/sandbox/nb/scratch_simple_hyperopt_20220422a.ipynb
- supplementary/bio-pcn/sandbox/nb/cpcn_diagnostics_20220427c.ipynb
- supplementary/bio-pcn/sandbox/nb/scratch_mnist_2hidden_20220505a.ipynb
- supplementary/bio-pcn/sandbox/nb/cpcn_diagnostics_20220503a.ipynb
- supplementary/bio-pcn/sandbox/nb/cpcn_diagnostics_20220427a.ipynb
- supplementary/bio-pcn/sandbox/nb/scratch_naive_mnist_20220503a.ipynb
- supplementary/bio-pcn/sandbox/scratch_rank_hidden.py
- supplementary/bio-pcn/sandbox/scratch_naive_cifar10.py
- supplementary/bio-pcn/sandbox/save/
- supplementary/bio-pcn/sandbox/save/.gitignore
- supplementary/bio-pcn/sandbox/data/
- supplementary/bio-pcn/sandbox/data/.gitignore
- supplementary/bio-pcn/cpcn/
- supplementary/bio-pcn/cpcn/nonlinear.py
- supplementary/bio-pcn/cpcn/wrapper.py
- supplementary/bio-pcn/cpcn/track.py
- supplementary/bio-pcn/cpcn/util.py
- supplementary/bio-pcn/cpcn/linear.py
- supplementary/bio-pcn/cpcn/graph.py
- supplementary/bio-pcn/cpcn/__init__.py
- supplementary/bio-pcn/cpcn/lfw_wrapper.py
- supplementary/bio-pcn/cpcn/tqdm_wrapper.py
- supplementary/bio-pcn/cpcn/train.py
- supplementary/bio-pcn/cpcn/pcn.py
- supplementary/supplement.pdf
