# Supplementary material
Source: ML conference proceedings conference paper supplement (https://proceedings.neurips.cc/paper_files/paper/2022/hash/5b5de8526aac159e37ff9547713677ed-Abstract.html)
Supplement: Supplementary file 1 [file 5b5de8526aac159e37ff9547713677ed-Supplemental-Conference.zip › supplementary/bio-pcn/conda.yml]

name:
  cpcn
channels:
- defaults
- conda-forge
dependencies:
 - python=3.9
 - pip
 - black
 - pytest
 - numpy
 - scipy
 - pandas
 - matplotlib
 - seaborn
 - pytorch::pytorch
 - pytorch::torchvision
 - scikit-learn
 - optuna
 - tqdm
 - jupyter
 - ipywidgets
 - pip:
   - pydove
