# Supplementary material
Source: ML conference proceedings conference paper supplement (https://proceedings.neurips.cc/paper_files/paper/2022/hash/5b5de8526aac159e37ff9547713677ed-Abstract.html)
Supplement: Supplementary file 1 [file 5b5de8526aac159e37ff9547713677ed-Supplemental-Conference.zip › supplementary/bio-pcn/cpcn/__init__.py]

from .linear import LinearBioPCN
from .nonlinear import BioPCN
from .pcn import PCNetwork
from .track import Tracker
from .util import make_onehot, one_hot_accuracy, load_mnist, load_csv, load_torchvision
from .util import load_supervised, load_lfw, get_constraint_diagnostics, dot_accuracy
from .util import read_best_hyperparams
from .train import Trainer, DivergenceError, DivergenceWarning, multi_lr
from .wrapper import PCWrapper
from .tqdm_wrapper import tqdmw
