# Supplementary material
Source: ML conference proceedings conference paper supplement (https://proceedings.neurips.cc/paper_files/paper/2022/hash/5b5de8526aac159e37ff9547713677ed-Abstract.html)
Supplement: Supplementary file 1 [file 5b5de8526aac159e37ff9547713677ed-Supplemental-Conference.zip › supplementary/bio-pcn/cpcn/graph.py]

"""Define functions for plotting."""

import pydove as dv
import matplotlib.pyplot as plt
import matplotlib as mpl
import seaborn as sns

import numpy as np

from types import SimpleNamespace
from typing import Optional, Tuple, Sequence, Callable


def show_constraint_diagnostics(
    diagnostics: dict, n_mat: int = 4, rho: float = 1.0, layer: int = 1
) -> plt.Figure:
    """Make a figure diagnosing the whitening constraint.

    Uses the diagnostics dictionary returned from `util.get_constraint_diagnostics`.

    :param diagnostics: dictionary of diagnostic measures
    :param n_mat: number of covariance matrices to display
    :param rho: limit on eigenvalues of covariance matrices
    :param layer: which layer to focus on
    :return: the figure that was created
    """
    fig = plt.figure(figsize=(7, 7), constrained_layout=True)

    # ensure the number of boxes is even
    n_mat = 2 * ((n_mat + 1) // 2)
    gs = mpl.gridspec.GridSpec(3, n_mat, figure=fig)

    mat_axs = [fig.add_subplot(gs[0, i]) for i in range(n_mat)]
    trace_ax = fig.add_subplot(gs[1:, : n_mat // 2])
    eval_ax = fig.add_subplot(gs[1:, n_mat // 2 :])

    # draw the matrices
    n_cov = len(diagnostics["batch"])
    sel_cov = np.linspace(0, n_cov - 1, 5, dtype=int)

    for ax, i in zip(mat_axs, sel_cov):
        crt_cov = diagnostics[f"cov:{layer}"][i]
        crt_scale = np.max(np.abs(crt_cov))
        ax.imshow(crt_cov, vmin=-crt_scale, vmax=crt_scale, cmap="RdBu_r")
        ax.set_title(f"batch {diagnostics['batch'][i]}")

    # draw the evolution of the trace of the constraint
    trace_ax.axhline(0, c="k", ls="--")
    trace_ax.plot(diagnostics["batch"], diagnostics[f"trace:{layer}"])
    trace_ax.annotate(
        f"{diagnostics[f'trace:{layer}'][-1]:.2g}",
        (diagnostics["batch"][-1], diagnostics[f"trace:{layer}"][-1]),
        xytext=(3, 0),
        textcoords="offset points",
        va="center",
        c="C0",
        fontweight="bold",
    )
    trace_ax.set_xlabel("batch")
    trace_ax.set_ylabel("trace of constraint")

    # draw the evolution of the eigenvalues
    eval_ax.axhline(rho, c="k", ls="--")
    eval_ax.plot(diagnostics["batch"], diagnostics[f"evals:{layer}"], alpha=0.5, lw=1)
    eval_ax.plot(diagnostics["batch"], diagnostics[f"max_eval:{layer}"], c="k", lw=2)
    eval_ax.annotate(
        f"{diagnostics[f'max_eval:{layer}'][-1]:.2g}",
        (diagnostics["batch"][-1], diagnostics[f"max_eval:{layer}"][-1]),
        xytext=(3, 0),
        textcoords="offset points",
        va="center",
        c="k",
        fontweight="bold",
    )
    eval_ax.set_xlabel("batch")
    eval_ax.set_ylabel("eigenvalues of $z$-cov")
    eval_ax.set_ylim(0, 5 * rho)

    for ax in [trace_ax, eval_ax]:
        sns.despine(ax=ax, offset=10)
        ax.set_xlim(0, None)

    return fig


def show_learning_curves(
    results: SimpleNamespace,
    axs: Optional[Tuple[plt.Axes]] = None,
    show_train: bool = True,
    show_val: bool = True,
    annotate_val: bool = True,
    labels: Tuple[str] = ("train", "val"),
    colors: Tuple[str] = ("C0", "C1"),
    var_names: Tuple[str, str] = ("pc_loss", "accuracy"),
    plot_kwargs: Optional[dict] = None,
) -> plt.Figure:
    """Make plot of predictive-coding loss and classification error rate.
    
    :param results: namespace of results, containing dictionaries `"train"` and
        `"validation"`
    :param axs: tuple of axes in which to make the plots, `(ax_loss, ax_acc)`
    :param show_train: whether to plot the training results
    :param show_val: whether to plot the validation results
    :param annotate_final: whether to annotate the final value
    :param labels: how to label the curves
    :param colors: how to color the curves
    :param var_names: tuple of variable names to plot, `(lhs, rhs)`
    :param plot_kwargs: keyword arguments to pass to plot
    :return: the Matplotlib figure that is created
    """
    # handle defaults
    if axs is None:
        fig, (ax1, ax2) = plt.subplots(1, 2, figsize=(12, 4), constrained_layout=True)
    else:
        ax1, ax2 = axs
        fig = ax1.get_figure()

    if plot_kwargs is None:
        plot_kwargs = {"alpha": 0.7, "lw": 1.0}
    else:
        plot_kwargs.setdefault("alpha", 0.7)
        if "linewidth" not in plot_kwargs and "lw" not in plot_kwargs:
            plot_kwargs.setdefault("lw", 1.0)

    if show_train:
        ax1.plot(
            results.train["batch"],
            results.train[var_names[0]],
            label=labels[0],
            c=colors[0],
            **plot_kwargs,
        )

    if show_val:
        ax1.plot(
            results.validation["batch"],
            results.validation[var_names[0]],
            label=labels[1],
            c=colors[1],
            **plot_kwargs,
        )
        if annotate_val:
            ax1.annotate(
                f"{results.validation[var_names[0]][-1]:.2g}",
                (results.validation["batch"][-1], results.validation[var_names[0]][-1]),
                xytext=(3, 0),
                textcoords="offset points",
                c=colors[1],
                va="center",
                fontweight="bold",
            )

    ax1.legend(frameon=False)
    ax1.set_yscale("log")
    ax1.set_xlabel("batch")
    if var_names[0] == "pc_loss":
        ax1.set_ylabel("predictive-coding loss")
    else:
        ax1.set_ylabel(var_names[0])

    if var_names[1] == "accuracy":
        val_error_rate = 100 * (1.0 - results.validation[var_names[1]])
        acc_suffix = "%"
    else:
        val_error_rate = results.validation[var_names[1]]
        acc_suffix = ""

    if show_train:
        if var_names[1] == "accuracy":
            train_error_rate = 100 * (1.0 - results.train[var_names[1]])
        else:
            train_error_rate = results.train[var_names[1]]
        ax2.plot(
            results.train["batch"],
            train_error_rate,
            label=labels[0],
            c=colors[0],
            **plot_kwargs,
        )

    if show_val:
        ax2.plot(
            results.validation["batch"],
            val_error_rate,
            label=labels[1],
            c=colors[1],
            **plot_kwargs,
        )
        if annotate_val:
            ax2.annotate(
                f"{val_error_rate[-1]:.2f}{acc_suffix}",
                (results.validation["batch"][-1], val_error_rate[-1]),
                xytext=(3, 0),
                textcoords="offset points",
                c=colors[1],
                va="center",
                fontweight="bold",
            )

    ax2.legend(frameon=False)
    ax2.set_ylim(0, None)
    ax2.set_xlabel("batch")
    if var_names[1] == "accuracy":
        ax2.set_ylabel("error rate (%)")
    else:
        ax2.set_ylabel(var_names[1])

    for ax in [ax1, ax2]:
        sns.despine(ax=ax, offset=10)
        ax.set_xlim(0, None)

    return fig


def show_weight_evolution(
    x: np.ndarray, weights: np.ndarray, ax: plt.Axes, max_lines: int = 10000
):
    weights = weights.reshape(len(weights), -1)
    n_lines = weights.shape[1]
    if n_lines > max_lines:
        idxs = np.linspace(0, n_lines - 1, max_lines, dtype=int)
        weights = weights[:, idxs]
        n_lines = max_lines
    alpha = max(min(50 / n_lines, 0.5), 0.01)
    ax.plot(x, weights, c="k", lw=0.5, alpha=alpha)

    ax.set_xlabel("batch")
    ax.set_ylabel("weight")


def show_latent_convergence(
    fast_results: dict, ax: Optional[plt.Axes] = None, var: str = "z", layer: int = 1
):
    """Make plots showing how the latent variables converge.

    This draws only the last sample of each batch.
    
    :param fast_results: dictionary containing the evolution of the latent variable
        `"z"` (the name can be overridden using the `var` argument; see below)
    :param ax: axes in which to make the plot; default: current axes
    :param var: name of latent variable
    :param layer: which layer to focus on
    """
    if ax is None:
        ax = plt.gca()

    cmap = mpl.cm.winter

    # focus on the last sample of each batch
    crt_sel = np.hstack((np.diff(fast_results["batch"]) > 0, True))

    batch = fast_results["batch"][crt_sel]
    z = fast_results[f"z:{layer}"][crt_sel]

    n = len(batch)
    for i in range(n):
        color = cmap(int(cmap.N * (0.2 + 0.8 * i / n)))
        diff = z[i, :, :] - z[i, 0, :]
        diff = diff / np.max(np.abs(diff))
        ax.plot(diff, c=color, lw=0.5)

    sm = mpl.cm.ScalarMappable(
        cmap=cmap, norm=mpl.pyplot.Normalize(vmin=0, vmax=np.max(batch))
    )
    sm.ax = ax
    cbar = dv.colorbar(sm)
    cbar.set_label("batch")

    ax.set_xlabel("fast dynamics iteration")
    ax.set_ylabel("latent $(z - z_0) / \\rm{max}| z - z_0|$")


def plot_with_error_interval(
    data: Sequence,
    ci: float = 0.95,
    x_var: str = "batch",
    y_var: str = "pc_loss",
    mask: Optional[Sequence] = None,
    center: Callable = np.median,
    ax: Optional[plt.Axes] = None,
    fill_kwargs: Optional[dict] = None,
    **kwargs,
):
    """Plot a summary of a set of curves, in terms of a central estimate (e.g., median)
    and error interval.

    This assumes that all the curves have the same set of `x` values.
    
    :param data: list of dictionaries, each representing a curve
    :param ci: size of confidence interval
    :param x_var: key in each dictionary of `data` representing values on the `x` axis
    :param y_var: key in each dictionary of `data` representing values on the `y` axis
    :param mask: mask used to subselect some of the data
    :param center: function used for the central estimate; should take an `axis` arg
    :param ax: axis to draw in; default: `plt.gca()`
    :param fill_kwargs: keyword arguments to be passed to `plt.fill_between()`
    :param **kwargs: additional keyword arguments are passed to `plt.plot()` for the
        central line
    """
    # handle defaults
    if ax is None:
        ax = plt.gca()
    if fill_kwargs is None:
        fill_kwargs = {}

    # parse the data
    x_values = np.asarray(data[0][x_var])
    for other in data[1:]:
        np.testing.assert_allclose(x_values, other[x_var])
    y_values = np.asarray([np.asarray(_[y_var]) for _ in data])

    # subselect
    if mask is not None:
        x_values = x_values[mask]
        y_values = y_values[:, mask]

    # draw the center line
    y_center = center(y_values, axis=0)
    h_center = ax.plot(x_values, y_center, **kwargs)

    # find the uncertainty interval
    q0 = (1 - ci) / 2
    q1 = 1 - q0
    y_low, y_high = np.quantile(y_values, [q0, q1], axis=0)

    # draw the uncertainty interval
    fill_kwargs.setdefault("color", h_center[0].get_color())
    fill_kwargs.setdefault("alpha", 0.3)
    fill_kwargs.setdefault("zorder", h_center[0].get_zorder() - 1.0)
    if all([_ not in fill_kwargs for _ in ["edgecolor", "edgecolors", "ec"]]):
        fill_kwargs["edgecolor"] = "none"
    h_fill = ax.fill_between(x_values, y_low, y_high, **fill_kwargs)

    return SimpleNamespace(h_center=h_center, h_fill=h_fill)
