# Supplementary material
Source: ML conference proceedings conference paper supplement (https://proceedings.neurips.cc/paper_files/paper/2022/hash/5b5de8526aac159e37ff9547713677ed-Abstract.html)
Supplement: Supplementary file 1 [file 5b5de8526aac159e37ff9547713677ed-Supplemental-Conference.zip › supplementary/bio-pcn/cpcn/tqdm_wrapper.py]

"""Define a wrapper for tqdm that outputs useful training progress info."""

import torch
import numpy as np

from typing import Iterable

from tqdm.autonotebook import tqdm

from cpcn.util import pretty_size


def tqdmw(train_it: Iterable, tqdm=tqdm) -> Iterable:
    """Add a progress bar to a training iterable, outputting progress information.

    The iterable must have a `len`gth.
    
    :param train_it: iteratble to wrap
    :param tqdm: tqdm(-like) construct to use
    """
    pbar = tqdm(total=len(train_it))
    for batch in train_it:
        yield batch

        progress_info = {}

        if hasattr(train_it, "_epoch"):
            progress_info["epoch"] = str(train_it._epoch)

        if (
            hasattr(train_it, "trainer")
            and hasattr(train_it.trainer, "metrics")
            and hasattr(train_it.trainer, "history")
            and hasattr(train_it.trainer.history, "validation")
        ):
            validation = train_it.trainer.history.validation
            for metric in train_it.trainer.metrics:
                if not isinstance(metric, str):
                    continue

                # make this robust -- would prefer to not fail due to progress bar
                try:
                    last_val = float(validation[metric][-1])
                    progress_str = f"{last_val:.3g}"
                except:
                    progress_str = "???"

                progress_info["val " + metric] = progress_str

        if torch.cuda.is_available():
            memory = torch.cuda.memory_allocated()
            progress_info["cuda_mem"] = pretty_size(memory)

        pbar.set_postfix(progress_info, refresh=False)
        pbar.update()

    pbar.close()
