# Supplementary material
Source: ML conference proceedings conference paper supplement (https://proceedings.neurips.cc/paper_files/paper/2022/hash/5b5de8526aac159e37ff9547713677ed-Abstract.html)
Supplement: Supplementary file 1 [file 5b5de8526aac159e37ff9547713677ed-Supplemental-Conference.zip › supplementary/bio-pcn/draft/hyper/run_once_large.sh]

#! /bin/bash

source ~/.bashrc

# run_once_large <seed> <dataset> <algo> <rho1> <rho2>

seed=$1
dataset=$2
algo=$3
rho1=$4
rho2=$5

hidden1=50
hidden2=5
arch="many_${hidden1}_${hidden2}"

trials=100
if [ "${algo}" = "wb" ]; then
    folder="${dataset}_${algo}_large"
    rho_args=""
else
    all_rho="${rho1}_${rho2}"
    folder="${dataset}_${algo}_large_rho${all_rho}"
    rho_args="--rho ${rho1} ${rho2}"
fi

mkdir -p ${folder}/log
outfile="${folder}/hyper_${seed}.pkl"

if [ -f "${outfile}" ]; then
    echo "output file ${outfile} exists! quitting!"
    exit 1
fi

conda activate cpcn

./optimize_net.py \
    "${outfile}" \
    $dataset \
    $algo \
    $arch \
    $trials \
    $seed \
    $rho_args \
    --lr 1e-3 0.05 \
    --lr-decay 1e-5 0.01 \
    --Q-lrf 0.1 10.0 \
    --Wa-lrf 0.3 4.0 \
    > "${folder}/log/out_${seed}.txt" \
    2> "${folder}/log/err_${seed}.txt"
