# Supplementary material
Source: ML conference proceedings conference paper supplement (https://proceedings.neurips.cc/paper_files/paper/2022/hash/5b5de8526aac159e37ff9547713677ed-Abstract.html)
Supplement: Supplementary file 1 [file 5b5de8526aac159e37ff9547713677ed-Supplemental-Conference.zip › supplementary/bio-pcn/draft/hyper/submit_task_other.sh]

#! /bin/bash

module load slurm
module load disBatch/beta

sbatch -p ccn -n80 -c2 disBatch task_file_other.db
