# Supplementary material
Source: ML conference proceedings conference paper supplement (https://proceedings.neurips.cc/paper_files/paper/2022/hash/5b5de8526aac159e37ff9547713677ed-Abstract.html)
Supplement: Supplementary file 1 [file 5b5de8526aac159e37ff9547713677ed-Supplemental-Conference.zip › supplementary/bio-pcn/draft/make_linear_rho_dep_figures_mmill_large.py]

# %% [markdown]
# # Make figures for the dependence on constraint scale, Mediamill

import os
import os.path as osp

import matplotlib as mpl
import matplotlib.pyplot as plt
import seaborn as sns
import pydove as dv

import torch
import numpy as np

from tqdm.notebook import tqdm

from typing import Tuple

import pickle

from cpcn.graph import plot_with_error_interval, show_constraint_diagnostics

# %%

paper_style = [
    "seaborn-paper",
    {
        "font.size": 7,
        "axes.labelsize": 7,
        "axes.labelpad": 1,
        "xtick.labelsize": 6,
        "ytick.labelsize": 6,
        "legend.fontsize": 6,
        "xtick.major.pad": 1,
        "ytick.major.pad": 1,
        "xtick.minor.pad": 1,
        "ytick.minor.pad": 1,
        "xtick.major.size": 1,
        "ytick.major.size": 1,
        "xtick.minor.size": 0.75,
        "ytick.minor.size": 0.75,
        "legend.labelspacing": 0,
        "legend.handlelength": 1.5,
        "axes.linewidth": 0.5,
    },
]

label_map = {"wb": "PC", "biopcn": "BioCCPC", "pcn": "PC + cons"}
color_map = {"wb": "C3", "pcn": "C5", "biopcn": "C0"}
style_map = {"wb": {"ls": "--"}, "pcn": {}, "biopcn": {}}

# mpl.rcParams["axes.prop_cycle"] = mpl.cycler(
#     color=[
#         "#555CA9",  # liberty
#         "#9B4688",  # violet crayola
#         "#CC8B8B",  # old rose
#         "#353531",  # black olive
#         "#000000",  # black
#     ]
# )

mpl.rcParams["axes.prop_cycle"] = mpl.cycler(
    color=[
        "#F15B40",  # red
        "#6DAADD",  # blue
        "#C5AC61",  # green-brown
        "#8C8E90",  # gray
        "#F9AA8F",  # light red
        "#B2CDEC",  # light blue
    ]
)

fig_path = "figs"

# %% [markdown]
# ### Learning curves

# %% [markdown]
# ## Load data

# %%

all_algo = ["wb", "pcn", "biopcn"]
all_rho_small = {
    "pcn": [0.05, 0.1, 0.2, 0.5, 1.0, 2.5, 5.0],
    "biopcn": [0.05, 0.1, 0.2, 0.5, 1.0, 2.5, 5.0],
    "wb": [1.0],
}
all_rho_large = {
    "pcn": [0.2, 0.5, 1.0, 2.5, 5.0, 10.0, 25.0],
    "biopcn": [0.2, 0.5, 1.0, 2.5, 5.0, 10.0, 25.0],
    "wb": [1.0],
}
all_histories = {}

arch = "large"
# arch = "small"
# unfortunately the naming convention for the hyperparam optimization wasn't
# very well chosen...
convert = lambda x: f"{x:.1f}" if np.abs(x - np.round(x)) < 1e-8 else f"{x:g}"

all_rho = all_rho_small if arch == "small" else all_rho_large
for algo in tqdm(all_algo, desc="algo"):
    contexts = {}
    base = f"mmill_{algo}_{arch}"
    for crt_rho in all_rho[algo]:
        value = base
        if algo != "wb":
            value += f"_rho{convert(crt_rho)}"
            if arch == "large":
                value += f"_{convert(crt_rho / 10)}"
        contexts[crt_rho] = value
    histories = {_: [] for _ in contexts}
    for crt_rho, context in contexts.items():
        path = osp.join("simulations", context)
        filenames = [
            osp.join(path, f)
            for f in os.listdir(path)
            if f.startswith("history_")
            and f.endswith(".pkl")
            and osp.isfile(os.path.join(path, f))
        ]
        for name in tqdm(filenames, desc=f"{algo}_rho{crt_rho:.1f}"):
            with open(name, "rb") as f:
                crt_history = pickle.load(f)
                del crt_history.weight
                del crt_history.constraint

                histories[crt_rho].append(crt_history)

    all_histories[algo] = histories

# %% [markdown]
# ## Make the plot


def lighten(color, amount: float) -> tuple:
    color = mpl.colors.to_rgba(color)
    light_color = tuple((1 - amount) * _ + amount for _ in color[:3]) + (color[-1],)
    return light_color


min_batch = 1
max_batch = 2000
with plt.style.context(paper_style):
    with dv.FigureManager() as (_, ax):
        crt_data = [_.validation for _ in all_histories["wb"][1.0]]
        crt_min_mask = crt_data[0]["batch"] >= min_batch
        crt_max_mask = crt_data[0]["batch"] < max_batch
        crt_mask = crt_min_mask & crt_max_mask
        plot_with_error_interval(
            crt_data,
            mask=crt_mask,
            c=color_map["wb"],
            lw=1,
            x_var="sample",
            y_var="pc_loss",
            fill_kwargs={"alpha": 0.2},
            **style_map["wb"],
        )

        for i, rho in enumerate(all_rho["biopcn"]):
            crt_data = [_.validation for _ in all_histories["biopcn"][rho]]
            crt_min_mask = crt_data[0]["batch"] >= min_batch
            crt_max_mask = crt_data[0]["batch"] < max_batch
            crt_mask = crt_min_mask & crt_max_mask
            # plot_with_error_interval(
            #     crt_data,
            #     mask=crt_mask,
            #     c=lighten(color_map["biopcn"], 0.7 * i / len(all_rho["biopcn"])),
            #     lw=1,
            #     x_var="sample",
            #     y_var="pc_loss",
            #     fill_kwargs={"alpha": 0.2},
            #     **style_map["biopcn"],
            # )
            try:
                crt_median = np.median(
                    np.asarray([_["pc_loss"][crt_mask] for _ in crt_data]), axis=0
                )
                ax.plot(
                    crt_data[0]["sample"][crt_mask],
                    crt_median,
                    lw=1,
                    c=lighten(color_map["biopcn"], 1.0 * i / len(all_rho["biopcn"])),
                    **style_map["biopcn"],
                )
            except IndexError:
                # skip runs that terminated early
                pass

        ax.set_xscale("log")
        ax.set_yscale("log")

        # ax.set_ylim(0.25, 5)

# %%

ci_level = 0.95
with plt.style.context(paper_style):
    with dv.FigureManager(
        figsize=(2.5, 1.75), despine_kws={"offset": 2}, constrained_layout=True
    ) as (fig, ax):
        biopcn_low = []
        biopcn_mid = []
        biopcn_high = []

        for crt_rho in all_rho["biopcn"]:
            crt_history = all_histories["biopcn"][crt_rho]
            crt_finals = np.array([_.validation["pc_loss"][-1] for _ in crt_history])

            # skip nans or infinities, if not too many
            if np.mean(np.isfinite(crt_finals)) > 0.75:
                crt_finals = crt_finals[np.isfinite(crt_finals)]

            crt_summaries = np.quantile(
                crt_finals, [(1 - ci_level) / 2, 0.5, (1 + ci_level) / 2]
            )
            biopcn_low.append(crt_summaries[0])
            biopcn_mid.append(crt_summaries[1])
            biopcn_high.append(crt_summaries[2])

        biopcn_low = np.asarray(biopcn_low)
        biopcn_mid = np.asarray(biopcn_mid)
        biopcn_high = np.asarray(biopcn_high)

        # ax.scatter(all_rho["biopcn"], biopcn_mid)
        ax.errorbar(
            all_rho["biopcn"],
            biopcn_mid,
            (biopcn_mid - biopcn_low, biopcn_high - biopcn_mid),
            ls="none",
            marker=".",
        )

        ax.set_xlabel("$\\rho$")
        ax.set_ylabel("final PC loss")

        ax.set_xscale("log")
        ax.set_yscale("log")

        crt_finals = [
            crt_history.validation["pc_loss"][-1]
            for crt_history in all_histories["wb"][1.0]
        ]
        crt_summaries = np.quantile(crt_finals, [0.2, 0.5, 0.8])
        ax.fill_between(
            ax.get_xlim(),
            crt_summaries[0],
            crt_summaries[2],
            color=color_map["wb"],
            alpha=0.2,
            edgecolor="none",
        )
        ax.axhline(crt_summaries[1], c=color_map["wb"], **style_map["wb"])

        # crt_lowest = long_wb_run.validation["pc_loss"][-1]
        # ax.axhline(crt_lowest, c="k")

        legend_elements = []
        for net_type in ["biopcn", "wb"]:
            legend_elements.append(
                plt.Line2D(
                    [1],
                    [1],
                    color=color_map[net_type],
                    label=label_map[net_type],
                    **style_map[net_type],
                )
            )

        ax.legend(handles=legend_elements, frameon=False, loc="upper center")

        ax.yaxis.set_major_formatter(mpl.ticker.FuncFormatter(lambda y, _: f"{y:g}"))
        ax.yaxis.set_minor_formatter(mpl.ticker.FuncFormatter(lambda y, _: f"{y:g}"))

fig.savefig(osp.join(fig_path, f"mmill_{arch}_rho_dep_pc_loss.pdf"))

# %%

ci_level = 0.95
with plt.style.context(paper_style):
    with dv.FigureManager(
        figsize=(2.5, 1.75), despine_kws={"offset": 2}, constrained_layout=True
    ) as (fig, ax):
        biopcn_low = []
        biopcn_mid = []
        biopcn_high = []

        for crt_rho in all_rho["biopcn"]:
            crt_history = all_histories["biopcn"][crt_rho]
            crt_finals = np.array(
                [_.validation["prediction_error"][-1] for _ in crt_history]
            )

            # skip nans or infinities, if not too many
            if np.mean(np.isfinite(crt_finals)) > 0.75:
                crt_finals = crt_finals[np.isfinite(crt_finals)]

            crt_summaries = np.quantile(
                crt_finals, [(1 - ci_level) / 2, 0.5, (1 + ci_level) / 2]
            )
            biopcn_low.append(crt_summaries[0])
            biopcn_mid.append(crt_summaries[1])
            biopcn_high.append(crt_summaries[2])

        biopcn_low = np.asarray(biopcn_low)
        biopcn_mid = np.asarray(biopcn_mid)
        biopcn_high = np.asarray(biopcn_high)

        # ax.scatter(all_rho["biopcn"], biopcn_mid)
        ax.errorbar(
            all_rho["biopcn"],
            biopcn_mid,
            (biopcn_mid - biopcn_low, biopcn_high - biopcn_mid),
            ls="none",
            marker=".",
        )

        ax.set_xlabel("$\\rho$")
        ax.set_ylabel("final prediction error")

        ax.set_xscale("log")
        ax.set_yscale("log")

        crt_finals = [
            crt_history.validation["prediction_error"][-1]
            for crt_history in all_histories["wb"][1.0]
        ]
        crt_summaries = np.quantile(crt_finals, [0.2, 0.5, 0.8])
        ax.fill_between(
            ax.get_xlim(),
            crt_summaries[0],
            crt_summaries[2],
            color=color_map["wb"],
            alpha=0.2,
            edgecolor="none",
        )
        ax.axhline(crt_summaries[1], c=color_map["wb"], **style_map["wb"])

        legend_elements = []
        for net_type in ["biopcn", "wb"]:
            legend_elements.append(
                plt.Line2D(
                    [1],
                    [1],
                    color=color_map[net_type],
                    label=label_map[net_type],
                    **style_map[net_type],
                )
            )

        ax.legend(handles=legend_elements, frameon=False, loc="upper center")

        # crt_lowest = long_wb_run.validation["prediction_error"][-1]
        # ax.axhline(crt_lowest, c="k")

        ax.yaxis.set_major_formatter(mpl.ticker.FuncFormatter(lambda y, _: f"{y:g}"))

fig.savefig(osp.join(fig_path, f"mmill_{arch}_rho_dep_pred_err.pdf"))

# %%
