# Supplementary material
Source: ML conference proceedings conference paper supplement (https://proceedings.neurips.cc/paper_files/paper/2022/hash/5b5de8526aac159e37ff9547713677ed-Abstract.html)
Supplement: Supplementary file 1 [file 5b5de8526aac159e37ff9547713677ed-Supplemental-Conference.zip › supplementary/bio-pcn/draft/simulations/submit_task_cifar10.sh]

#! /bin/bash

module load slurm
module load disBatch/beta

sbatch -p ccn -n40 -c2 --job-name cifar10 disBatch task_file_cifar10.db
