# Supplementary material
Source: ML conference proceedings conference paper supplement (https://proceedings.neurips.cc/paper_files/paper/2022/hash/5b5de8526aac159e37ff9547713677ed-Abstract.html)
Supplement: Supplementary file 1 [file 5b5de8526aac159e37ff9547713677ed-Supplemental-Conference.zip › supplementary/bio-pcn/draft/visualize_hyper.py]

# %% [markdown]
# # Visualize results from hyperparameter optimization

import os

import matplotlib.pyplot as plt
import pydove as dv
import pickle

# %% [markdown]
# ## Load optuna results

# %%

contexts = [
    "mnist_pcn_small_rho1.0",
    "mnist_biopcn_small_rho1.0",
    "mnist_pcn_large_rho1.0_0.1",
    "mnist_biopcn_large_rho1.0_0.1",
]

studies = {}
for context in contexts:
    path = os.path.join("hyper", context)
    filenames = [
        os.path.join(path, f)
        for f in os.listdir(path)
        if os.path.isfile(os.path.join(path, f))
    ]

    studies[context] = []
    for name in filenames:
        with open(name, "rb") as f:
            studies[context].append(pickle.load(f))

# %% [markdown]
# ## Show best parameters from each run

pairs = [("lr", "lr_decay"), ("z_lr", "Q_lrf")]
for context, study_set in studies.items():
    param_values = {
        param: [_.best_params[param] for _ in study_set]
        for param in ["z_lr", "lr", "lr_decay", "Q_lrf"]
    }
    pc_loss = [_.best_value for _ in study_set]

    with dv.FigureManager(1, 2, figsize=(6, 2.5)) as (fig, axs):
        for ax, pair in zip(axs, pairs):
            x_values = param_values[pair[0]]
            y_values = param_values[pair[1]]
            h = ax.scatter(x_values, y_values, c=pc_loss, s=5, cmap="plasma", alpha=0.7)
            cb = dv.colorbar(h)

            ax.set_xlabel(pair[0])
            ax.set_ylabel(pair[1])
            cb.set_label("PC loss")

            ax.set_xscale("log")
            ax.set_yscale("log")

            ax.tick_params(axis="x", which="both", labelrotation=-35)

        fig.suptitle(context)

# %%
