# Supplementary material
Source: ML conference proceedings conference paper supplement (https://proceedings.neurips.cc/paper_files/paper/2022/hash/5b5de8526aac159e37ff9547713677ed-Abstract.html)
Supplement: Supplementary file 1 [file 5b5de8526aac159e37ff9547713677ed-Supplemental-Conference.zip › supplementary/bio-pcn/requirements.txt]

appnope==0.1.2
argon2-cffi==20.1.0
async-generator==1.10
attrs==21.2.0
backcall==0.2.0
bleach==3.3.0
cffi==1.14.5
cycler==0.10.0
decorator==5.0.7
defusedxml==0.7.1
entrypoints==0.3
iniconfig==1.1.1
ipykernel==5.5.4
ipython==7.23.1
ipython-genutils==0.2.0
ipywidgets==7.6.3
jedi==0.18.0
Jinja2==2.11.3
jsonschema==3.2.0
jupyter-client==6.1.12
jupyter-core==4.7.1
jupyterlab-pygments==0.1.2
jupyterlab-widgets==1.0.0
kiwisolver==1.3.1
MarkupSafe==2.0.0
matplotlib==3.4.2
matplotlib-inline==0.1.2
mistune==0.8.4
nbclient==0.5.3
nbconvert==6.0.7
nbformat==5.1.3
nest-asyncio==1.5.1
notebook==6.3.0
numpy==1.20.3
packaging==20.9
pandas==1.2.4
pandocfilters==1.4.3
parso==0.8.2
patsy==0.5.1
pexpect==4.8.0
pickleshare==0.7.5
Pillow==8.2.0
pluggy==0.13.1
prometheus-client==0.10.1
prompt-toolkit==3.0.18
ptyprocess==0.7.0
py==1.10.0
pycparser==2.20
pydove==0.3.4
Pygments==2.9.0
pyparsing==2.4.7
pyrsistent==0.17.3
pytest==6.2.4
python-dateutil==2.8.1
pytz==2021.1
pyzmq==22.0.3
scipy==1.6.3
seaborn==0.11.1
Send2Trash==1.5.0
six==1.16.0
statsmodels==0.12.2
terminado==0.9.5
testpath==0.4.4
toml==0.10.2
torch==1.8.1
torchvision==0.9.1
tornado==6.1
tqdm==4.60.0
traitlets==5.0.5
typing-extensions==3.10.0.0
wcwidth==0.2.5
webencodings==0.5.1
widgetsnbextension==3.5.1
