# Supplementary material
Source: ML conference proceedings conference paper supplement (https://proceedings.neurips.cc/paper_files/paper/2022/hash/5b5de8526aac159e37ff9547713677ed-Abstract.html)
Supplement: Supplementary file 1 [file 5b5de8526aac159e37ff9547713677ed-Supplemental-Conference.zip › supplementary/bio-pcn/sandbox/nb/cpcn_diagnostics_20220427c.ipynb]

# %% [markdown]
 # Diagnosing BioPCN

# %% [code]
from types import SimpleNamespace
from functools import partial
import pydove as dv
import matplotlib as mpl

import torch

from tqdm.notebook import tqdm

from cpcn import LinearBioPCN, load_mnist, Trainer

# %% [markdown]
 ## Setup

# %% [code]
device = torch.device("cpu")

# for reproducibility
torch.manual_seed(123)

# this creates the loaders
batch_size = 100
dataset = load_mnist(
    n_train=2000, n_validation=500, batch_size=batch_size, device=device
)

# %% [markdown]
 ## Train BioPCN

# %% [code]
n_epochs = 300
dims = [784, 5, 10]

z_it = 100
z_lr = 0.1
tau = 1.0

torch.manual_seed(123)

# match the PCN network
g_a = 0.5 * torch.ones(len(dims) - 2)
g_a[-1] *= 2

g_b = 0.5 * torch.ones(len(dims) - 2)
g_b[0] *= 2

rho = 0.015

net = LinearBioPCN(
    dims,
    z_lr=z_lr,
    z_it=z_it,
    g_a=g_a,
    g_b=g_b,
    c_m=0,
    l_s=g_b,
    rho=rho,
    tau=tau,
    fast_optimizer=torch.optim.Adam,
    bias_a=False,
    bias_b=False,
)
net = net.to(device)

trainer = Trainer(net, dataset["train"], dataset["validation"])
trainer.set_classifier("linear")

initial_lr = 0.004
final_lr = initial_lr
trainer.set_optimizer(torch.optim.Adam, lr=initial_lr)
# trainer.set_optimizer(torch.optim.SGD, lr=initial_lr)
power = 0.8
rate = (initial_lr / final_lr - 1) / (n_epochs ** power)
trainer.add_scheduler(
    partial(
        torch.optim.lr_scheduler.LambdaLR,
        lr_lambda=lambda epoch: 1 / (1 + rate * epoch ** power),
    )
)

trainer.peek_epoch("weight", ["W_a", "W_b", "Q", "M"])
trainer.peek_sample("latent", ["z"])

fast_epochs = torch.linspace(0, n_epochs - 1, 4).int()
batch_max = len(dataset["train"])
trainer.peek_fast_dynamics(
    "fast",
    ["a", "b", "z", "n"],
    condition=lambda epoch, batch: epoch in fast_epochs and batch == batch_max - 1,
)

results = trainer.run(n_epochs, progress=tqdm)

# %% [markdown]
 ## Check convergence of latent variables

# %% [code]
with dv.FigureManager() as (_, ax):
    cmap = mpl.cm.winter
    crt_sel = trainer.history.fast["sample"] == batch_size - 1

    crt_epoch = trainer.history.fast["epoch"][crt_sel]
    crt_z = trainer.history.fast["z:1"][crt_sel]

    n = len(crt_epoch)
    for i in range(n):
        color = cmap(int(cmap.N * (0.2 + 0.8 * i / n)))
        crt_diff = crt_z[i, :, :] - crt_z[i, 0, :]
        crt_diff = crt_diff / torch.max(torch.abs(crt_diff))
        ax.plot(crt_diff, c=color, lw=0.5)

    sm = mpl.cm.ScalarMappable(cmap=cmap, norm=mpl.pyplot.Normalize(vmin=0, vmax=n))
    sm.ax = ax
    cbar = dv.colorbar(sm)
    cbar.set_label("epoch")

    ax.set_xlabel("fast dynamics iteration")
    ax.set_ylabel("latent $(z - z_0) / \\rm{max}| z - z_0|$")

# %% [markdown]
 ## Check whitening constraint in hidden layer

# %% [code]
hidden_size = net.pyr_dims[1]
z_cov = torch.zeros((n_epochs, hidden_size, hidden_size))
for epoch in range(n_epochs):
    crt_sel = trainer.history.latent["epoch"] == epoch
    crt_z = trainer.history.latent["z:1"][crt_sel]

    z_cov[epoch] = crt_z.T @ crt_z / len(crt_z)

tr_cons = [
    torch.trace(z_cov[i] - net.rho[0] * torch.eye(hidden_size)) for i in range(n_epochs)
]
sel_epochs = torch.linspace(0, n_epochs - 1, 5).int()
with dv.FigureManager(
    1, len(sel_epochs), do_despine=False, figsize=(2.5 * len(sel_epochs), 2)
) as (_, axs):
    for ax, epoch in zip(axs, sel_epochs):
        ax.imshow(z_cov[epoch])
        ax.set_title(f"epoch {epoch}")

max_eval = [torch.max(torch.linalg.eigh(_)[0]) for _ in z_cov]
with dv.FigureManager(1, 2) as (_, (ax1, ax2)):
    ax1.axhline(0, c="k", ls="--")
    ax1.plot(tr_cons)
    ax1.annotate(
        f"{tr_cons[-1]:.2g}",
        (len(tr_cons), tr_cons[-1]),
        xytext=(3, 0),
        textcoords="offset points",
        va="center",
        c="C0",
        fontweight="bold",
    )
    ax1.set_xlabel("epoch")
    ax1.set_ylabel("trace of constraint")

    ax2.axhline(rho, c="k", ls="--")
    ax2.plot(max_eval)
    ax2.annotate(
        f"{max_eval[-1]:.2g}",
        (len(max_eval), max_eval[-1]),
        xytext=(3, 0),
        textcoords="offset points",
        va="center",
        c="C0",
        fontweight="bold",
    )
    ax2.set_xlabel("epoch")
    ax2.set_ylabel("maximum $z$-cov eval")
    ax2.set_ylim(0, 5 * rho)

# %% [code]
all_evals = torch.stack([torch.linalg.eigh(_)[0] for _ in z_cov])
with dv.FigureManager() as (_, ax):
    ax.axhline(rho, c="k", ls="--", lw=1)
    ax.plot(all_evals, alpha=0.5, lw=1)
    ax.set_xlabel("epoch")
    ax.set_ylabel("evals of $z$-cov")
    ax.set_ylim(0, 5 * rho)

# %% [markdown]
 ## Show loss and accuracy evolution

# %% [code]
with dv.FigureManager(1, 2) as (_, (ax1, ax2)):
    ax1.plot(results.train["pc_loss"], label="train")
    ax1.plot(results.validation["pc_loss"], label="val")
    ax1.legend(frameon=False)
    ax1.annotate(
        f"{results.validation['pc_loss'][-1]:.2g}",
        (n_epochs, results.validation["pc_loss"][-1]),
        xytext=(3, 0),
        textcoords="offset points",
        c="C1",
        va="center",
        fontweight="bold",
    )
    ax1.set_yscale("log")
    ax1.set_xlabel("epoch")
    ax1.set_ylabel("predictive-coding loss")

    train_error_rate = 100 * (1.0 - results.train["accuracy"])
    val_error_rate = 100 * (1.0 - results.validation["accuracy"])
    ax2.plot(train_error_rate, label="train")
    ax2.plot(val_error_rate, label="val")
    ax2.legend(frameon=False)
    ax2.annotate(
        f"{val_error_rate[-1]:.1f}%",
        (n_epochs, val_error_rate[-1]),
        xytext=(3, 0),
        textcoords="offset points",
        c="C1",
        va="center",
        fontweight="bold",
    )
    ax2.set_ylim(0, None)
    ax2.set_xlabel("epoch")
    ax2.set_ylabel("error rate (%)")

# %% [markdown]
 ## Check weight evolution

# %% [code]
D = len(net.inter_dims)
with dv.FigureManager(2, D, squeeze=False) as (_, axs):
    for ax_row, w_choice in zip(axs, ["W_a", "W_b"]):
        for k, ax in enumerate(ax_row):
            crt_data = trainer.history.weight[f"{w_choice}:{k}"].reshape(n_epochs, -1)
            n_lines = crt_data.shape[1]
            alpha = max(min(50 / n_lines, 0.5), 0.01)
            ax.plot(crt_data, c="k", lw=0.5, alpha=alpha)

            ax.set_xlabel("epoch")
            ax.set_ylabel(w_choice)

            if w_choice == "W_a":
                ax.set_title(f"layer {k}")
