# Supplementary material
Source: ML conference proceedings conference paper supplement (https://proceedings.neurips.cc/paper_files/paper/2022/hash/5b5de8526aac159e37ff9547713677ed-Abstract.html)
Supplement: Supplementary file 1 [file 5b5de8526aac159e37ff9547713677ed-Supplemental-Conference.zip › supplementary/bio-pcn/sandbox/nb/scratch_mnist_2hidden_20220504a.ipynb]

# %% [markdown]
 # Comparison of PCN and BioPCN on MNIST with two hidden (linear) layers

# %% [code]
import matplotlib.pyplot as plt
import seaborn as sns
import pydove as dv

import numpy as np
import torch

from tqdm.notebook import tqdm
from functools import partial

from cpcn import LinearBioPCN, PCNetwork, load_mnist, Trainer

# %% [markdown]
 ## Setup

# %% [code]
device = torch.device("cpu")

# for reproducibility
torch.manual_seed(123)

# get train, validation, and test loaders for MNIST
dataset = load_mnist(n_validation=1000, device=device)

# %% [markdown]
 ## Train PCN

# %% [code]
n_batches = 3000
dims = [784, 10, 5, 10]
it_inference = 50
lr_inference = 0.07
rho = 0.02
# rho = 0.0012

torch.manual_seed(123)

net = PCNetwork(
    dims,
    activation=lambda _: _,
    lr_inference=lr_inference,
    it_inference=it_inference,
    variances=1.0,
    constrained=True,
    rho=rho,
    bias=False,
)
net = net.to(device)

trainer = Trainer(net, dataset["train"], dataset["validation"])
trainer.peek_validation(every=10)
trainer.set_classifier("linear")

trainer.set_optimizer(torch.optim.Adam, lr=0.003)
# trainer.add_scheduler(partial(torch.optim.lr_scheduler.ExponentialLR, gamma=0.99))

results = trainer.run(n_batches=n_batches, progress=tqdm)

# %% [markdown]
 ### Show PCN learning curves

# %% [code]
with dv.FigureManager(1, 2) as (_, (ax1, ax2)):
    ax1.semilogy(results.train["pc_loss"], label="train")
    ax1.semilogy(results.validation["pc_loss"], label="val")
    ax1.set_xlabel("batch")
    ax1.set_ylabel("predictive-coding loss")
    ax1.legend(frameon=False)
    last_loss = results.train["pc_loss"][-1]
    ax1.annotate(f"{last_loss:.3f}", (len(results.train["pc_loss"]), last_loss), c="C0")
    last_loss = results.validation["pc_loss"][-1]
    ax1.annotate(
        f"{last_loss:.3f}", (len(results.validation["pc_loss"]), last_loss), c="C1"
    )

    ax2.plot(100 * (1 - results.train["accuracy"]), label="train")
    ax2.plot(100 * (1 - results.validation["accuracy"]), label="val")
    ax2.set_xlabel("batch")
    ax2.set_ylabel("error rate (%)")
    ax2.legend(frameon=False)
    last_acc = 100 * (1 - results.train["accuracy"][-1])
    ax2.annotate(f"{last_acc:.1f}%", (len(results.train["accuracy"]), last_acc), c="C0")
    last_acc = 100 * (1 - results.validation["accuracy"][-1])
    ax2.annotate(
        f"{last_acc:.1f}%", (len(results.validation["accuracy"]), last_acc), c="C1"
    )
    ax2.set_ylim(0, 100)

# %% [markdown]
 ## Train BioPCN

# %% [code]
z_it = 50
z_lr = 0.02
Q_lr_factor = 2.0

torch.manual_seed(123)

# match the PCN network
g_a = 0.5 * np.ones(len(dims) - 2)
g_a[-1] *= 2

g_b = 0.5 * np.ones(len(dims) - 2)
g_b[0] *= 2

biopcn_net = LinearBioPCN(
    dims,
    z_lr=z_lr,
    z_it=z_it,
    g_a=g_a,
    g_b=g_b,
    c_m=0,
    l_s=g_b,
    rho=rho,
    bias_a=False,
    bias_b=False,
    q0_scale=np.sqrt(1 + dims[2] / dims[1]),
)
biopcn_net = biopcn_net.to(device)

biopcn_trainer = Trainer(biopcn_net, dataset["train"], dataset["validation"])
biopcn_trainer.peek_validation(every=10)
biopcn_trainer.set_classifier("linear")

biopcn_trainer.set_optimizer(torch.optim.Adam, lr=0.004)
biopcn_trainer.set_lr_factor("Q", Q_lr_factor)
# biopcn_trainer.add_scheduler(partial(torch.optim.lr_scheduler.ExponentialLR, gamma=0.997))

biopcn_results = biopcn_trainer.run(n_batches=n_batches, progress=tqdm)

# %% [markdown]
 ### Show BioPCN learning curves

# %% [code]
with dv.FigureManager(1, 2) as (_, (ax1, ax2)):
    ax1.semilogy(
        results.train["pc_loss"], c="C0", ls="--", alpha=0.7, label="Whittington&Bogacz"
    )
    ax1.semilogy(results.validation["pc_loss"], c="C1", ls="--", alpha=0.7)

    ax1.semilogy(biopcn_results.train["pc_loss"], c="C0", label="train")
    ax1.semilogy(biopcn_results.validation["pc_loss"], c="C1", label="val")

    last_loss = results.validation["pc_loss"][-1]
    ax1.annotate(
        f"{last_loss:.3f}", (len(results.validation["pc_loss"]), last_loss), c="C1"
    )
    last_loss = biopcn_results.validation["pc_loss"][-1]
    ax1.annotate(
        f"{last_loss:.3f}",
        (len(biopcn_results.validation["pc_loss"]), last_loss),
        c="C1",
    )

    ax1.set_xlabel("batch")
    ax1.set_ylabel("predictive-coding loss")
    ax1.legend(frameon=False)

    ax2.plot(
        100 * (1 - results.train["accuracy"]),
        c="C0",
        ls="--",
        alpha=0.7,
        label="Whittington&Bogacz",
    )
    ax2.plot(100 * (1 - results.validation["accuracy"]), c="C1", ls="--", alpha=0.7)
    ax2.plot(100 * (1 - biopcn_results.train["accuracy"]), c="C0", label="train")
    ax2.plot(100 * (1 - biopcn_results.validation["accuracy"]), c="C1", label="val")
    ax2.set_xlabel("batch")
    ax2.set_ylabel("error rate (%)")

    last_acc = 100 * (1 - results.validation["accuracy"][-1])
    ax2.annotate(
        f"{last_acc:.1f}%", (len(results.validation["accuracy"]), last_acc), c="C1"
    )
    last_acc = 100 * (1 - biopcn_results.validation["accuracy"][-1])
    ax2.annotate(
        f"{last_acc:.1f}%",
        (len(biopcn_results.validation["accuracy"]), last_acc),
        c="C1",
    )

    ax2.legend(frameon=False)
    ax2.set_ylim(0, 100)
