# Supplementary material
Source: ML conference proceedings conference paper supplement (https://proceedings.neurips.cc/paper_files/paper/2022/hash/5b5de8526aac159e37ff9547713677ed-Abstract.html)
Supplement: Supplementary file 1 [file 5b5de8526aac159e37ff9547713677ed-Supplemental-Conference.zip › supplementary/bio-pcn/sandbox/nb/scratch_mnist_large_20220517a.ipynb]

# %% [markdown]
 # Comparison of PCN and BioPCN on MNIST with two large hidden (linear) layers

# %% [code]
import matplotlib.pyplot as plt
import seaborn as sns
import pydove as dv

import numpy as np
import torch

from tqdm.notebook import tqdm
from functools import partial

from cpcn import (
    LinearBioPCN,
    PCNetwork,
    load_mnist,
    Trainer,
    get_constraint_diagnostics,
)
from cpcn.graph import (
    show_learning_curves,
    show_constraint_diagnostics,
    show_latent_convergence,
)

# %% [markdown]
 ## Setup

# %% [code]
device = torch.device("cuda" if torch.cuda.is_available() else "cpu")
# device = torch.device("cpu")

# for reproducibility
torch.manual_seed(123)

# get train, validation, and test loaders for MNIST
dataset = load_mnist(n_validation=500, device=device)

# %% [markdown]
 ## Train PCN

# %% [code]
n_batches = 2000
dims = [784, 50, 5, 10]
z_it = 50
z_lr = 0.07
rho = 0.1
# rho = 0.0012

torch.manual_seed(123)

net = PCNetwork(
    dims,
    activation=lambda _: _,
    z_lr=z_lr,
    z_it=z_it,
    variances=1.0,
    # constrained=True,
    constrained=False,
    rho=rho,
    bias=False,
)
net = net.to(device)

trainer = Trainer(net, dataset["train"], dataset["validation"])
trainer.peek_validation(every=10)
trainer.set_classifier("linear")

trainer.set_optimizer(torch.optim.SGD, lr=0.008)
# trainer.set_optimizer(torch.optim.Adam, lr=0.002)
# trainer.add_scheduler(partial(torch.optim.lr_scheduler.ExponentialLR, gamma=0.99))

results = trainer.run(n_batches=n_batches, progress=tqdm)

# %% [markdown]
 ### Show PCN learning curves

# %% [code]
_ = show_learning_curves(results)

# %% [markdown]
 ## Train BioPCN

# %% [code]
z_it = 50
z_lr = 0.02
Q_lr_factor = 6

torch.manual_seed(123)

# match the PCN network
g_a = 0.5 * np.ones(len(dims) - 2)
g_a[-1] *= 2

g_b = 0.5 * np.ones(len(dims) - 2)
g_b[0] *= 2

biopcn_net = LinearBioPCN(
    dims,
    z_lr=z_lr,
    z_it=z_it,
    g_a=g_a,
    g_b=g_b,
    c_m=0,
    l_s=g_b,
    rho=rho,
    bias_a=False,
    bias_b=False,
    q0_scale=np.sqrt(1 + dims[2] / dims[1]),
)
biopcn_net = biopcn_net.to(device)

biopcn_trainer = Trainer(biopcn_net, dataset["train"], dataset["validation"])
biopcn_trainer.peek_validation(every=10).add_nan_guard(every=10)
biopcn_trainer.set_classifier("linear")

# biopcn_trainer.set_optimizer(torch.optim.Adam, lr=0.001)
biopcn_trainer.set_optimizer(torch.optim.SGD, lr=0.012)
biopcn_trainer.set_lr_factor("Q", Q_lr_factor)
biopcn_trainer.set_lr_factor("W_a:0", 2)
biopcn_trainer.set_lr_factor("W_a:1", 2)
# biopcn_trainer.add_scheduler(partial(torch.optim.lr_scheduler.ExponentialLR, gamma=0.997))

lr_power = 1.0
# lr_rate = -0.4e-3
lr_rate = 0
biopcn_trainer.add_scheduler(
    partial(
        torch.optim.lr_scheduler.LambdaLR,
        lr_lambda=lambda batch: 1 / (1 + lr_rate * batch ** lr_power),
    ),
    every=1,
)

biopcn_trainer.peek_sample("latent", ["z"])
biopcn_trainer.peek_fast_dynamics("fast", ["z"], count=4)
biopcn_trainer.peek("weight", ["W_a", "W_b", "Q"], every=10)

biopcn_results = biopcn_trainer.run(n_batches=n_batches, progress=tqdm)

# %% [markdown]
 ### Show BioPCN learning curves

# %% [code]
with dv.FigureManager(1, 2) as (_, axs):
    show_learning_curves(
        results,
        show_train=False,
        labels=("", "Whittington&Bogacz"),
        colors=("C0", "gray"),
        axs=axs,
    )
    show_learning_curves(
        biopcn_results,
        show_train=False,
        labels=("", "BioPCN"),
        colors=("C0", "red"),
        axs=axs,
    )

# %% [code]
with dv.FigureManager(1, 2) as (_, (ax1, ax2)):
    show_latent_convergence(biopcn_results.fast, layer=1, ax=ax1)
    show_latent_convergence(biopcn_results.fast, layer=2, ax=ax2)

# %% [markdown]
 ### Show covariance diagnostics

# %% [code]
biopcn_cons_diag = get_constraint_diagnostics(biopcn_results.latent, rho=rho)
_ = show_constraint_diagnostics(biopcn_cons_diag, layer=1, rho=rho)
_ = show_constraint_diagnostics(biopcn_cons_diag, layer=2, rho=rho)
