# Supplementary material
Source: ML conference proceedings conference paper supplement (https://proceedings.neurips.cc/paper_files/paper/2022/hash/5b5de8526aac159e37ff9547713677ed-Abstract.html)
Supplement: Supplementary file 1 [file 5b5de8526aac159e37ff9547713677ed-Supplemental-Conference.zip › supplementary/bio-pcn/sandbox/nb/scratch_naive_mnist_20220422a.ipynb]

# %% [markdown]
 # Quick comparison of PCN and CPCN on MNIST

# %% [code]
import matplotlib.pyplot as plt
import seaborn as sns
import pydove as dv

import numpy as np
import torch

from tqdm.notebook import tqdm

from cpcn import LinearCPCNetwork, PCNetwork, load_mnist, Trainer

# %% [markdown]
 ## Setup

# %% [code]
# device = torch.device("cuda" if torch.cuda.is_available() else "cpu")
device = torch.device("cpu")

# for reproducibility
torch.manual_seed(123)

# this creates the loaders, by default
dataset = load_mnist(n_train=5000, n_validation=1000, device=device)

# %% [markdown]
 ## Train PCN

# %% [code]
n_epochs = 50
dims = [784, 5, 10]
it_inference = 50
lr_inference = 0.1

torch.manual_seed(123)

net = PCNetwork(
    dims,
    activation=lambda _: _,
    lr_inference=lr_inference,
    it_inference=it_inference,
    variances=1.0,
    bias=False,
)
net = net.to(device)

trainer = Trainer(net, dataset["train"], dataset["validation"])
trainer.set_classifier("linear")
results = trainer.run(n_epochs, progress=tqdm)

# %% [markdown]
 ### Show PCN learning curves

# %% [code]
with dv.FigureManager(1, 2) as (_, (ax1, ax2)):
    ax1.semilogy(results.train.pc_loss, label="train")
    ax1.semilogy(results.validation.pc_loss, label="val")
    ax1.set_xlabel("epoch")
    ax1.set_ylabel("predictive-coding loss")
    ax1.legend(frameon=False)
    last_loss = results.train.pc_loss[-1]
    ax1.annotate(f"{last_loss:.3f}", (len(results.train.pc_loss), last_loss), c="C0")
    last_loss = results.validation.pc_loss[-1]
    ax1.annotate(
        f"{last_loss:.3f}", (len(results.validation.pc_loss), last_loss), c="C1"
    )

    ax2.plot(100 * (1 - results.train.accuracy), label="train")
    ax2.plot(100 * (1 - results.validation.accuracy), label="val")
    ax2.set_xlabel("epoch")
    ax2.set_ylabel("error rate (%)")
    ax2.legend(frameon=False)
    last_acc = 100 * (1 - results.train.accuracy[-1])
    ax2.annotate(f"{last_acc:.1f}%", (len(results.train.accuracy), last_acc), c="C0")
    last_acc = 100 * (1 - results.validation.accuracy[-1])
    ax2.annotate(
        f"{last_acc:.1f}%", (len(results.validation.accuracy), last_acc), c="C1"
    )
    ax2.set_ylim(0, 100)

# %% [markdown]
 ## Train CPCN

# %% [code]
z_it = 100
z_lr = 0.05

torch.manual_seed(123)

# match the PCN network
g_a = 0.5 * np.ones(len(dims) - 2)
g_a[-1] *= 2

g_b = 0.5 * np.ones(len(dims) - 2)
g_b[0] *= 2

cpcn_net = LinearCPCNetwork(
    dims,
    z_lr=z_lr,
    z_it=z_it,
    g_a=g_a,
    g_b=g_b,
    c_m=0,
    l_s=g_b,
    bias_a=False,
    bias_b=False,
)
cpcn_net = cpcn_net.to(device)

cpcn_trainer = Trainer(cpcn_net, dataset["train"], dataset["validation"])
cpcn_trainer.set_classifier("linear")
cpcn_results = cpcn_trainer.run(n_epochs, progress=tqdm)

# %% [markdown]
 ### Show CPCN learning curves

# %% [code]
with dv.FigureManager(1, 2) as (_, (ax1, ax2)):
    ax1.semilogy(
        results.train.pc_loss, c="C0", ls="--", alpha=0.7, label="Whittington&Bogacz"
    )
    ax1.semilogy(results.validation.pc_loss, c="C1", ls="--", alpha=0.7)

    ax1.semilogy(cpcn_results.train.pc_loss, c="C0", label="train")
    ax1.semilogy(cpcn_results.validation.pc_loss, c="C1", label="val")

    last_loss = results.validation.pc_loss[-1]
    ax1.annotate(
        f"{last_loss:.3f}", (len(results.validation.pc_loss), last_loss), c="C1"
    )
    last_loss = cpcn_results.validation.pc_loss[-1]
    ax1.annotate(
        f"{last_loss:.3f}", (len(cpcn_results.validation.pc_loss), last_loss), c="C1"
    )

    ax1.set_xlabel("epoch")
    ax1.set_ylabel("predictive-coding loss")
    ax1.legend(frameon=False)

    ax2.plot(
        100 * (1 - results.train.accuracy),
        c="C0",
        ls="--",
        alpha=0.7,
        label="Whittington&Bogacz",
    )
    ax2.plot(100 * (1 - results.validation.accuracy), c="C1", ls="--", alpha=0.7)
    ax2.plot(100 * (1 - cpcn_results.train.accuracy), c="C0", label="train")
    ax2.plot(100 * (1 - cpcn_results.validation.accuracy), c="C1", label="val")
    ax2.set_xlabel("epoch")
    ax2.set_ylabel("error rate (%)")

    last_acc = 100 * (1 - results.validation.accuracy[-1])
    ax2.annotate(
        f"{last_acc:.1f}%", (len(results.validation.accuracy), last_acc), c="C1"
    )
    last_acc = 100 * (1 - cpcn_results.validation.accuracy[-1])
    ax2.annotate(
        f"{last_acc:.1f}%", (len(cpcn_results.validation.accuracy), last_acc), c="C1"
    )

    ax2.legend(frameon=False)
    ax2.set_ylim(0, 100)
