# Supplementary material
Source: ML conference proceedings conference paper supplement (https://proceedings.neurips.cc/paper_files/paper/2022/hash/5b5de8526aac159e37ff9547713677ed-Abstract.html)
Supplement: Supplementary file 1 [file 5b5de8526aac159e37ff9547713677ed-Supplemental-Conference.zip › supplementary/bio-pcn/sandbox/nb/scratch_naive_mnist_20220422b.ipynb]

# %% [markdown]
 # Quick comparison of PCN and CPCN on MNIST

# %% [code]
import matplotlib.pyplot as plt
import seaborn as sns
import pydove as dv

import numpy as np
import torch

from tqdm.notebook import tqdm
from functools import partial

from cpcn import LinearCPCNetwork, PCNetwork, load_mnist, Trainer

# %% [markdown]
 ## Setup

# %% [code]
# device = torch.device("cuda" if torch.cuda.is_available() else "cpu")
device = torch.device("cpu")

# for reproducibility
torch.manual_seed(123)

# this creates the loaders, by default
dataset = load_mnist(n_train=5000, n_validation=1000, device=device)

# %% [markdown]
 ## Train PCN

# %% [code]
n_epochs = 50
dims = [784, 5, 10]
it_inference = 50
lr_inference = 0.01

torch.manual_seed(123)

net = PCNetwork(
    dims,
    activation=lambda _: _,
    lr_inference=lr_inference,
    it_inference=it_inference,
    variances=1.0,
    bias=False,
)
net = net.to(device)

trainer = Trainer(net, dataset["train"], dataset["validation"])
trainer.set_classifier("linear")

trainer.set_optimizer(torch.optim.Adam, lr=0.004)
trainer.add_scheduler(partial(torch.optim.lr_scheduler.ExponentialLR, gamma=0.988))

results = trainer.run(n_epochs, progress=tqdm)

# %% [markdown]
 ### Show PCN learning curves

# %% [code]
with dv.FigureManager(1, 2) as (_, (ax1, ax2)):
    ax1.semilogy(results.train.pc_loss, label="train")
    ax1.semilogy(results.validation.pc_loss, label="val")
    ax1.set_xlabel("epoch")
    ax1.set_ylabel("predictive-coding loss")
    ax1.legend(frameon=False)
    last_loss = results.train.pc_loss[-1]
    ax1.annotate(f"{last_loss:.3f}", (len(results.train.pc_loss), last_loss), c="C0")
    last_loss = results.validation.pc_loss[-1]
    ax1.annotate(
        f"{last_loss:.3f}", (len(results.validation.pc_loss), last_loss), c="C1"
    )

    ax2.plot(100 * (1 - results.train.accuracy), label="train")
    ax2.plot(100 * (1 - results.validation.accuracy), label="val")
    ax2.set_xlabel("epoch")
    ax2.set_ylabel("error rate (%)")
    ax2.legend(frameon=False)
    last_acc = 100 * (1 - results.train.accuracy[-1])
    ax2.annotate(f"{last_acc:.1f}%", (len(results.train.accuracy), last_acc), c="C0")
    last_acc = 100 * (1 - results.validation.accuracy[-1])
    ax2.annotate(
        f"{last_acc:.1f}%", (len(results.validation.accuracy), last_acc), c="C1"
    )
    ax2.set_ylim(0, 100)

# %% [markdown]
 ## Train CPCN

# %% [code]
z_it = 50
z_lr = 0.15

torch.manual_seed(123)

# match the PCN network
g_a = 0.5 * np.ones(len(dims) - 2)
g_a[-1] *= 2

g_b = 0.5 * np.ones(len(dims) - 2)
g_b[0] *= 2

cpcn_net = LinearCPCNetwork(
    dims,
    z_lr=z_lr,
    z_it=z_it,
    g_a=g_a,
    g_b=g_b,
    c_m=0,
    l_s=g_b,
    bias_a=False,
    bias_b=False,
)
cpcn_net = cpcn_net.to(device)

cpcn_trainer = Trainer(cpcn_net, dataset["train"], dataset["validation"])
cpcn_trainer.set_classifier("linear")

cpcn_trainer.set_optimizer(torch.optim.SGD, lr=0.01)
cpcn_trainer.add_scheduler(partial(torch.optim.lr_scheduler.ExponentialLR, gamma=0.997))

cpcn_results = cpcn_trainer.run(n_epochs, progress=tqdm)

# %% [markdown]
 ### Show CPCN learning curves

# %% [code]
with dv.FigureManager(1, 2) as (_, (ax1, ax2)):
    ax1.semilogy(
        results.train.pc_loss, c="C0", ls="--", alpha=0.7, label="Whittington&Bogacz"
    )
    ax1.semilogy(results.validation.pc_loss, c="C1", ls="--", alpha=0.7)

    ax1.semilogy(cpcn_results.train.pc_loss, c="C0", label="train")
    ax1.semilogy(cpcn_results.validation.pc_loss, c="C1", label="val")

    last_loss = results.validation.pc_loss[-1]
    ax1.annotate(
        f"{last_loss:.3f}", (len(results.validation.pc_loss), last_loss), c="C1"
    )
    last_loss = cpcn_results.validation.pc_loss[-1]
    ax1.annotate(
        f"{last_loss:.3f}", (len(cpcn_results.validation.pc_loss), last_loss), c="C1"
    )

    ax1.set_xlabel("epoch")
    ax1.set_ylabel("predictive-coding loss")
    ax1.legend(frameon=False)

    ax2.plot(
        100 * (1 - results.train.accuracy),
        c="C0",
        ls="--",
        alpha=0.7,
        label="Whittington&Bogacz",
    )
    ax2.plot(100 * (1 - results.validation.accuracy), c="C1", ls="--", alpha=0.7)
    ax2.plot(100 * (1 - cpcn_results.train.accuracy), c="C0", label="train")
    ax2.plot(100 * (1 - cpcn_results.validation.accuracy), c="C1", label="val")
    ax2.set_xlabel("epoch")
    ax2.set_ylabel("error rate (%)")

    last_acc = 100 * (1 - results.validation.accuracy[-1])
    ax2.annotate(
        f"{last_acc:.1f}%", (len(results.validation.accuracy), last_acc), c="C1"
    )
    last_acc = 100 * (1 - cpcn_results.validation.accuracy[-1])
    ax2.annotate(
        f"{last_acc:.1f}%", (len(cpcn_results.validation.accuracy), last_acc), c="C1"
    )

    ax2.legend(frameon=False)
    ax2.set_ylim(0, 100)
