# Supplementary material
Source: ML conference proceedings conference paper supplement (https://proceedings.neurips.cc/paper_files/paper/2022/hash/5b5de8526aac159e37ff9547713677ed-Abstract.html)
Supplement: Supplementary file 1 [file 5b5de8526aac159e37ff9547713677ed-Supplemental-Conference.zip › supplementary/bio-pcn/sandbox/nb/scratch_simple_hyperopt_20220419a.ipynb]

# %% [markdown]
 # A simple test of using `optuna` for hyperparameter optimization

# %% [code]
import time
from types import SimpleNamespace

import pydove as dv
from tqdm.notebook import tqdm

import torch
from cpcn import LinearCPCNetwork, load_mnist, train

import optuna
from optuna.trial import TrialState

# %% [markdown]
 ## Defining the optimization

# %% [code]
def optuna_reporter(trial: optuna.trial.Trial, ns: SimpleNamespace):
    trial.report(ns.epoch_val_loss, ns.epoch)

    # early pruning
    if trial.should_prune():
        raise optuna.exceptions.TrialPruned()


def create_cpcn(trial):
    n_hidden = trial.suggest_int("n_hidden", 1, 3)
    dims = [28 * 28]
    for i in range(n_hidden):
        n_units = trial.suggest_int(f"n_units_l{i}", 4, 128)
        dims.append(n_units)
    dims.append(10)

    z_lr = trial.suggest_float("z_lr", 1e-5, 1e-1, log=True)

    # set parameters to match a simple PCN network
    g_a = 0.5 * torch.ones(len(dims) - 2)
    g_a[-1] *= 2

    g_b = 0.5 * torch.ones(len(dims) - 2)
    g_b[0] *= 2

    net = LinearCPCNetwork(dims, z_lr=z_lr, z_it=50, g_a=g_a, g_b=g_b, c_m=0, l_s=g_b)

    return net


def objective(
    trial: optuna.trial.Trial, n_epochs: int, dataset: dict, device: torch.device
) -> float:
    net = create_cpcn(trial).to(device)

    optimizer_type = trial.suggest_categorical("optimizer", ["Adam", "RMSprop", "SGD"])
    lr = trial.suggest_float("lr", 1e-5, 1e-1, log=True)

    optimizer_class = getattr(torch.optim, optimizer_type)
    optimizer_kws = {"lr": lr}

    results = train(
        net,
        n_epochs,
        dataset["train"],
        dataset["validation"],
        optimizer=optimizer_class,
        optimizer_kwargs=optimizer_kws,
        reporter=lambda ns: optuna_reporter(trial, ns),
    )

    return results.validation.pc_loss[-1]

# %% [code]
# minimizing PC loss
t0 = time.time()

device = torch.device("cpu")

n_epochs = 15
dataset = load_mnist(n_train=2000, n_validation=1000, batch_size=128)

study = optuna.create_study(direction="minimize")
study.optimize(
    lambda trial: objective(trial, n_epochs, dataset, device),
    n_trials=100,
    timeout=600,
    show_progress_bar=True,
)

pruned_trials = study.get_trials(deepcopy=False, states=[TrialState.PRUNED])
complete_trials = study.get_trials(deepcopy=False, states=[TrialState.COMPLETE])

t1 = time.time()

# %% [code]
print(
    f"{len(study.trials)} trials in {t1 - t0:.1f} seconds: "
    f"{len(complete_trials)} complete, {len(pruned_trials)} pruned."
)

trial = study.best_trial
print(f"best pc_loss: {trial.value}, for params:")
for key, value in trial.params.items():
    print("    {}: {}".format(key, value))

# %% [code]
optuna.visualization.matplotlib.plot_param_importances(study)
