# Supplementary material
Source: ML conference proceedings conference paper supplement (https://proceedings.neurips.cc/paper_files/paper/2022/hash/5b5de8526aac159e37ff9547713677ed-Abstract.html)
Supplement: Supplementary file 1 [file 5b5de8526aac159e37ff9547713677ed-Supplemental-Conference.zip › supplementary/bio-pcn/sandbox/nb/scratch_simple_hyperopt_pcn_20220422a.ipynb]

# %% [markdown]
 # A simple test of using `optuna` for hyperparameter optimization

# %% [code]
import time
from types import SimpleNamespace

import pydove as dv
from tqdm.notebook import tqdm

import torch
from cpcn import PCNetwork, load_mnist, Trainer

import optuna
from optuna.trial import TrialState

# %% [markdown]
 ## Defining the optimization

# %% [code]
def optuna_reporter(trial: optuna.trial.Trial, ns: SimpleNamespace):
    trial.report(ns.val_loss, ns.epoch)

    # early pruning
    if trial.should_prune():
        raise optuna.exceptions.TrialPruned()


def create_pcn(trial):
    # n_hidden = trial.suggest_int("n_hidden", 1, 3)
    n_hidden = 1
    # dims = [28 * 28]
    # for i in range(n_hidden):
    #     n_units = trial.suggest_int(f"n_units_l{i}", 3, 64)
    #     dims.append(n_units)
    # dims.append(10)
    dims = [28 * 28, 5, 10]

    z_lr = trial.suggest_float("z_lr", 1e-5, 0.2, log=True)
    net = PCNetwork(dims, lr_inference=z_lr, it_inference=50, variances=1, bias=False)

    return net


def objective(
    trial: optuna.trial.Trial, n_epochs: int, dataset: dict, device: torch.device
) -> float:
    net = create_pcn(trial).to(device)

    optimizer_type = trial.suggest_categorical("optimizer", ["Adam", "RMSprop", "SGD"])
    optimizer_class = getattr(torch.optim, optimizer_type)
    # optimizer_class = torch.optim.Adam
    lr = trial.suggest_float("lr", 1e-5, 1e-1, log=True)

    rep_gamma = trial.suggest_float("rep_gamma", 1e-7, 0.2, log=True)

    trainer = Trainer(net, dataset["train"], dataset["validation"])
    trainer.set_optimizer(optimizer_class, lr=lr)
    trainer.add_scheduler(
        lambda optim: torch.optim.lr_scheduler.ExponentialLR(optim, gamma=1 - rep_gamma)
    )

    trainer.add_epoch_observer(lambda ns: optuna_reporter(trial, ns))
    results = trainer.run(n_epochs)

    return results.validation.pc_loss[-1]

# %% [code]
# minimizing PC loss
t0 = time.time()

device = torch.device("cpu")

n_epochs = 50
dataset = load_mnist(n_train=2000, n_validation=1000, batch_size=100)

study = optuna.create_study(direction="minimize")
study.optimize(
    lambda trial: objective(trial, n_epochs, dataset, device),
    n_trials=200,
    timeout=1800,
    show_progress_bar=True,
)

pruned_trials = study.get_trials(deepcopy=False, states=[TrialState.PRUNED])
complete_trials = study.get_trials(deepcopy=False, states=[TrialState.COMPLETE])

t1 = time.time()

# %% [code]
print(
    f"{len(study.trials)} trials in {t1 - t0:.1f} seconds: "
    f"{len(complete_trials)} complete, {len(pruned_trials)} pruned."
)

trial = study.best_trial
print(f"best pc_loss: {trial.value}, for params:")
for key, value in trial.params.items():
    print("    {}: {}".format(key, value))

# %% [code]
optuna.visualization.matplotlib.plot_param_importances(study)
