# Supplementary material
Source: ML conference proceedings conference paper supplement (https://proceedings.neurips.cc/paper_files/paper/2022/hash/5b5de8526aac159e37ff9547713677ed-Abstract.html)
Supplement: Supplementary file 1 [file 5b5de8526aac159e37ff9547713677ed-Supplemental-Conference.zip › supplementary/bio-pcn/setup.py]

from distutils.core import setup

setup(
    name="cpcn",
    version="0.0.1",
    author="Tiberiu Tesileanu",
    author_email="ttesileanu@flatironinstitute.org",
    url="https://github.com/ttesileanu/cpcn",
    packages=["cpcn"],
    install_requires=[
        "numpy",
        "scipy",
        "setuptools",
        "torch",
        "torchvision",
        "matplotlib",
        "seaborn",
        "tqdm",
        "pydove",
        "ipykernel",
    ],
)
